# Supplementary material for: Impact of Remote Consultations on Antibiotic Prescribing in Primary Health Care: Systematic Review
Source: PubMed Central journal article supplement (PMC7655728; doi:10.2196/23482), 2020-11-09
Supplement: jmir_v22i11e23482_app2.pdf [file jmir_v22i11e23482_app2.pdf]

MEDLINE (through OVID)

|                           |                                                                                                                                                                                                                                                                                                                                                                                                                                                                                                                                                                                                                                                                                  |
|---------------------------|----------------------------------------------------------------------------------------------------------------------------------------------------------------------------------------------------------------------------------------------------------------------------------------------------------------------------------------------------------------------------------------------------------------------------------------------------------------------------------------------------------------------------------------------------------------------------------------------------------------------------------------------------------------------------------|
| #1<br>Antibiotics         | anti-bacterial agents/ <i>or</i> antibiotic* <i>or</i> anti-biotic* <i>or</i> antibacterial* <i>or</i> anti-bacterial* <i>or</i> antimicrobial* <i>or</i> anti-microbial* <i>or</i> antiinfective* <i>or</i> anti-infective*                                                                                                                                                                                                                                                                                                                                                                                                                                                     |
| #2<br>Remote consultation | remote consultation/ <i>or</i> telemedicine/ <i>or</i> exp teleconsultation/ <i>or</i> exp telehealth/ <i>or</i> tele* <i>or</i> mobile applications/ <i>or</i> mobile app* <i>or</i> remote* <i>or</i> skype <i>or</i> phone* <i>or</i> video* <i>or</i> web* <i>or</i> internet* <i>or</i> email* <i>or</i> real-time <i>or</i> realtime <i>or</i> online <i>or</i> virtual* <i>or</i> e-consult* <i>or</i> econsult* <i>or</i> electronic consult* <i>or</i> electronic communicat* <i>or</i> ecommunicat* <i>or</i> e-communicat* <i>or</i> eadvi#e <i>or</i> e-advi#e <i>or</i> electronic advi#e <i>or</i> e-health <i>or</i> ehealth <i>or</i> e-visit* <i>or</i> evisit* |
| #3<br>Primary care        | Exp general practice/ <i>or</i> family practice/ <i>or</i> exp general practitioners/ <i>or</i> primary health care/ <i>or</i> physicians, family/ <i>or</i> physicians, primary care/ <i>or</i> (primary adj2 care) <i>or</i> primary healthcare <i>or</i> general practice* <i>or</i> family practice* <i>or</i> general practitioner* <i>or</i> general physician* <i>or</i> GP <i>or</i> family adj2 care <i>or</i> family doctor* <i>or</i> family medic* <i>or</i> family physician* <i>or</i> ambulatory care                                                                                                                                                             |

Search strategy: #1 AND #2 AND #3

EMBASE (through OVID)

|                           |                                                                                                                                                                                                                                                                                                                                                                                                                                                                                                                                                                                                                                                                                       |
|---------------------------|---------------------------------------------------------------------------------------------------------------------------------------------------------------------------------------------------------------------------------------------------------------------------------------------------------------------------------------------------------------------------------------------------------------------------------------------------------------------------------------------------------------------------------------------------------------------------------------------------------------------------------------------------------------------------------------|
| #1<br>Antibiotics         | *antibiotic agent/ <i>or</i> antibiotic* <i>or</i> anti-biotic* <i>or</i> antibacterial* <i>or</i> anti-bacterial* <i>or</i> antimicrobial* <i>or</i> anti-microbial* <i>or</i> antiinfective* <i>or</i> anti-infective*                                                                                                                                                                                                                                                                                                                                                                                                                                                              |
| #2<br>Remote consultation | Telemedicine/ <i>or</i> exp teleconsultation/ <i>or</i> exp telehealth/ <i>or</i> tele* <i>or</i> mobile application/ <i>or</i> mobile health application/ <i>or</i> mobile app* <i>or</i> remote* <i>or</i> skype <i>or</i> phone* <i>or</i> video* <i>or</i> web* <i>or</i> internet* <i>or</i> email* <i>or</i> real-time <i>or</i> realtime <i>or</i> online <i>or</i> virtual* <i>or</i> e-consult* <i>or</i> econsult* <i>or</i> electronic consult* <i>or</i> electronic communicat* <i>or</i> ecommunicat* <i>or</i> e-communicat* <i>or</i> eadvi#e <i>or</i> e-advi#e <i>or</i> electronic advi#e <i>or</i> e-health <i>or</i> ehealth <i>or</i> e-visit* <i>or</i> evisit* |
| #3<br>Primary care        | Exp general practice/ <i>or</i> exp general practitioner/ <i>or</i> exp primary medical care/ <i>or</i> primary adj2 care <i>or</i> primary healthcare <i>or</i> general practice* <i>or</i> family practice* <i>or</i> general practitioner* <i>or</i> general physician* <i>or</i> GP <i>or</i> family physician* <i>or</i> family medic* <i>or</i> ambulatory care <i>or</i> exp primary health care/ <i>or</i> exp primary medical care/ <i>or</i> family adj2 care <i>or</i> family doctor*                                                                                                                                                                                      |

Search strategy: #1 AND #2 AND #3

HMIC (through OVID)

|                           |                                                                                                                                                                                                                                                                                                                                                                                                                                                          |
|---------------------------|----------------------------------------------------------------------------------------------------------------------------------------------------------------------------------------------------------------------------------------------------------------------------------------------------------------------------------------------------------------------------------------------------------------------------------------------------------|
| #1<br>Antibiotics         | exp antibiotics/ or antibiotic* or anti-biotic* or antibacterial* or anti-bacterial* or antimicrobial* or anti-microbial* or antiinfective* or anti-infective*                                                                                                                                                                                                                                                                                           |
| #2<br>Remote consultation | Exp telehealth/ or exp telemedicine/ or exp telecare/ or exp telephone consultations/ or tele* or mobile app* or remote* or skype or phone* or telephone* or video* or web* or internet* or email* or real-time or realtime or online or virtual* or e-consult* or econsult* or electronic consult* or electronic communicat* or ecommunicat* or e-communicat* or eadvi#e or e-advi#e or electronic advi#e or e-health or ehealth or e-visit* or evisit* |
| #3<br>Primary care        | Exp general practice/ or exp general practitioners/ or exp primary care/ or primary adj2 care or primary healthcare or general practice* or family practice* or general practitioner* or general physician* or GP or family physician* or family medicine or ambulatory care or family adj2 care or family doctor* or family medic* practitioner*                                                                                                        |

Search strategy: #1 AND #2 AND #3

PSYCINFO (through OVID)

|                           |                                                                                                                                                                                                                                                                                                                                                                                                                     |
|---------------------------|---------------------------------------------------------------------------------------------------------------------------------------------------------------------------------------------------------------------------------------------------------------------------------------------------------------------------------------------------------------------------------------------------------------------|
| #1<br>Antibiotics         | exp Antibiotics/ or antibiotic* or anti-biotic* or antibacterial* or anti-bacterial* or antimicrobial* or anti-microbial* or antiinfective* or anti-infective*                                                                                                                                                                                                                                                      |
| #2<br>Remote consultation | Telemedicine/ or teleconsultation/ or exp Mobile Applications/ or tele* or mobile app* or remote* or skype or phone* or video* or web* or internet* or email* or real-time or realtime or online or virtual* or e-consult* or econsult* or electronic consult* or electronic communicat* or ecommunicat* or e-communicat* or eadvi#e or e-advi#e or electronic advi#e or e-health or ehealth or e-visit* or evisit* |
| #3<br>Primary care        | exp General Practitioners/ or Primary Health Care/ or Family Medicine/ or Family Physicians/ or primary adj2 care or primary healthcare or general practice* or family practice* or general practitioner* or general physician* or GP or family physician* or family medic* or ambulatory care or family adj2 care or family doctor*                                                                                |

Search strategy: #1 AND #2 AND #3

CINAHL (through EBSCOhost)

|                           |                                                                                                                                                                                                                                                                                                                                                                                                                                                           |
|---------------------------|-----------------------------------------------------------------------------------------------------------------------------------------------------------------------------------------------------------------------------------------------------------------------------------------------------------------------------------------------------------------------------------------------------------------------------------------------------------|
| #1<br>Antibiotics         | (MH "Antibiotics") OR antibiotic* OR anti-biotic* OR antibacterial* OR anti-bacterial* OR antimicrobial* OR anti-microbial* OR antiinfective* OR anti-infective*                                                                                                                                                                                                                                                                                          |
| #2<br>Remote consultation | (MH "Remote Consultation") OR (MH "Telemedicine") OR (MH "Telehealth") OR (MH "Mobile Applications") OR tele* OR mobile app* OR remote* OR skype OR phone* OR video* OR web* OR internet* OR email* OR real-time OR realtime OR online OR virtual* OR e-consult* OR econsult* OR electronic consult* OR electronic communicat* OR ecommunicat* OR e-communicat* OR eadvi#e OR e-advi#e OR electronic advi#e OR e-health OR ehealth OR e-visit* OR evisit* |
| #3<br>Primary care        | (MH "Physicians, Family") OR (MH "Family Practice") OR (MH "Primary Health Care") OR primary N1 care OR primary healthcare OR general practice* OR family practice* OR general practitioner* OR general physician* OR GP OR family physician* OR family medic* OR ambulatory care OR family N1 care OR family doctor*                                                                                                                                     |

Search strategy: #1 AND #2 AND #3
